# Supplementary material for: A sensitive fluorescence biosensor based on metal ion-mediated DNAzyme activity for amplified detection of acetylcholinesterase
Source: Royal Society of Chemistry journal article supplement (doi:10.1039/d2an00414c), 2022-01-01
Supplement: d2an00414c1.pdf [file d2an00414c1.pdf]

## Supplementary information:

### A sensitive fluorescence biosensor based on metal ion-mediated DNzyme activity for amplified detection of acetylcholinesterase

Xu-Hua Zhao<sup>a,1</sup>, Xiao-Chun Dai<sup>a,1</sup>, Han-Xiao Zhang<sup>a</sup>, Ya-Nan Zhou<sup>a</sup>, Xiao-Hua Cui<sup>a</sup>, Xiang Zhai<sup>a</sup>, Bao-Feng Yu<sup>a,\*</sup>, and Zhi-Ling Song<sup>b,\*</sup>

<sup>a</sup> Department of Biochemistry and Molecular Biology, Shanxi Medical University, Taiyuan, Shanxi 030001, P. R. China

<sup>b</sup> Key Laboratory of Optic-electric Sensing and Analytical Chemistry for Life Science, MOE, Shandong Key Laboratory of Biochemical Analysis, College of Chemistry and Molecular Engineering, Qingdao University of Science and Technology, Qingdao 266042, China

<sup>1</sup> These authors contributed equally.

\*Corresponding author E-mail address: [songzhiling2010@163.com](mailto:songzhiling2010@163.com)

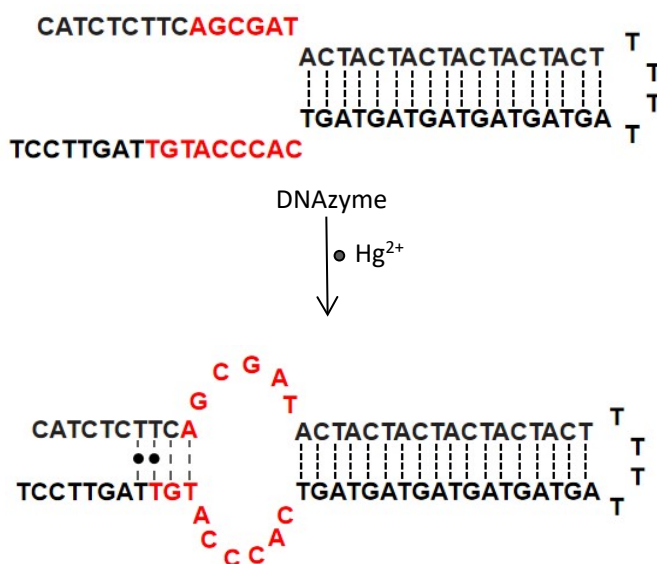

Figure S1: Secondary structures of Mgzyme and Mgzyme-Hg<sup>2+</sup> complex. The red nucleotides were the highly-conserved nucleotides of Mgzyme.

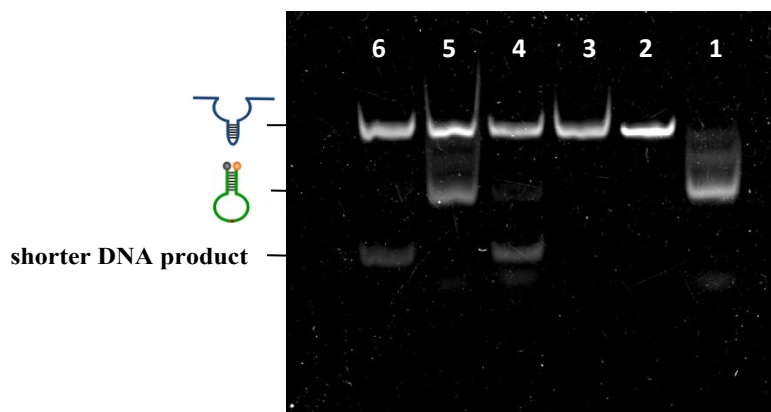

Figure S2: Nondenaturing PAGE (12%) analysis of detection MB digestion. Lane 1: MB; Lane 2: Mgzyme; Lane 3: mixture of  $\text{Hg}^{2+}$  and Mgzyme; Lane 4: mixture of Mgzyme and MB at 1:2 molar ratio; Lane 5: mixture of MB, Mgzyme,  $\text{Hg}^{2+}$  and ATCh; MB, Mgzyme,  $\text{Hg}^{2+}$  at 1:2:10 molar ratio; Lane 6: mixture of MB, Mgzyme,  $\text{Hg}^{2+}$ , ATCh and AChE, MB; Mgzyme,  $\text{Hg}^{2+}$  at 1:2:10 molar ratio.

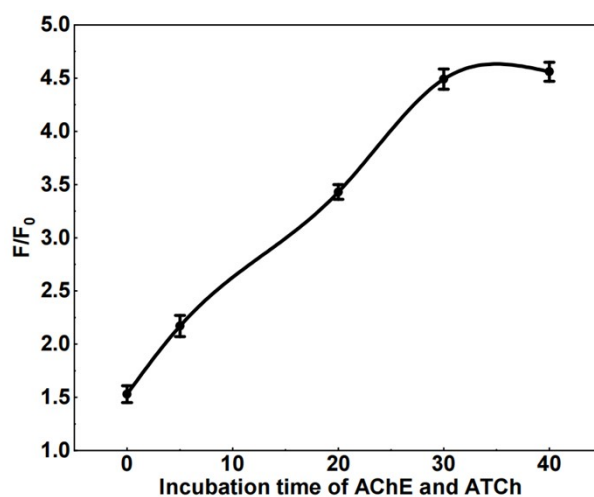

Figure S3: The effect of incubation time of AChE and ATCh on the fluorescence response of the sensing system. The concentrations of Mgzyme, MB,  $\text{Hg}^{2+}$  and ATCh are 50 nM, 100 nM, 500 nM and 16  $\mu\text{M}$ . F and  $F_0$  are the fluorescence intensities of the biosensor in the presence and absence of 2 mU/mL AChE, respectively.
